# Supplementary material
Source: Springer Nature journal article supplement (https://www.springermedizin.de/resource/supplementary/12916_2012_600_MOESM1_ESM.pdf/9597952)
Supplement: MOESM1 [file 9597952]

File Home Insert Page Layout Formulas Data Review View

Cut Copy Paste Format Painter

Trebuchet MS 11

Font

Wrap Text

Alignment

General

Number

Conditional Formatting

Format as Table

Cell Styles

Insert

Delete

Format

Cells

AutoSum

Fill

Clear

Sort & Filter

Find & Select

Editing

H2

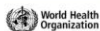

World Health Organization

DASHBOARD

## United Republic of Tanzania

## HOME

HOME

SETUP

WORKSHEETS

REPORTS

CHARTS

PLUG-INS

INDEX

## CERVICAL CANCER PREVENTION AND CONTROL COSTING (C4P) TOOL

## COSTING WORKSHEETS

TASK 1: MICROPLANNING

TASK 2: VACCINES

TASK 3: TRAINING

TASK 4: SOCIAL MOBILISATION / IEC

TASK 5: SERVICE DELIVERY

TASK 6: SUPERVISION MONITORING

TASK 7: COLD CHAIN SUPPLEMENTAL

TASK 8: OTHER

## STEPS TO A CUSTOMISED COST ESTIMATE

STEP 1: SETUP CUSTOMISATION

STEP 2: INPUT BASIC STRATEGY

STEP 3: COMPLETE WORKSHEETS

STEP 4: REVIEW REPORTS

## REPORTS AND CHARTS

OUTPUTS REPORT

INTRODUCTION COSTS REPORT

RECURRENT COSTS REPORT

TOTAL COSTS REPORT

CHARTS

PROJECTED FINANCIAL TOTAL

\$ 71,143,291

PROJECTED ECONOMIC TOTAL

\$ 107,547,968

PROJECTED # FIGS

1,950,575

COST PER FIG (FINANCIAL)

\$ 36.47

COST PER FIG (ECONOMIC)

\$ 55.14

HOME

DASHBOARD

A. OWNER

B. LABELS

C. SUBNATIONAL INFO

D. ECONOMIC INPUTS

E. STRATEGY

F. UNIT COSTS

MICROPLANNING

VACCINES

Ready

100%
